# Supplementary material for: Evaluation of the Cross-reactivity of Antidrug Antibodies to CT-P13 and Infliximab Reference Product (Remicade): An Analysis Using Immunoassays Tagged with Both Agents
Source: PubMed Central journal article supplement — BioDrugs. 2017 May 11;31(3):223–37. doi: 10.1007/s40259-017-0219-4 (PMC5443869; doi:10.1007/s40259-017-0219-4), 2017-05-11
Supplement: 40259_2017_219_MOESM1_ESM.pdf [file 40259_2017_219_MOESM1_ESM.pdf]

**Online Resources for:**

**Evaluation of the cross-reactivity of antidrug antibodies to CT-P13 and infliximab reference product (Remicade): an analysis using immunoassays tagged with both agents**

Walter Reinisch, Jørgen Jahnsen, Stefan Schreiber, Silvio Danese, Julián Panés, Alejandro Balsa, Won Park, JiSoo Kim, JeeUn Lee, Dae Hyun Yoo

**Corresponding author:** Professor Dae Hyun Yoo

Division of Rheumatology, Hanyang University Hospital for Rheumatic Diseases, Seoul, Republic of Korea. Email: dhyoo@hanyang.ac.kr

**Journal:** BioDrugs

**Online resource 1.** Baseline patient characteristics for the PLANETAS safety population

(patients with ankylosing spondylitis)

| Characteristic*                    | CT-P13 5 mg/kg<br>(n=128) | RP 5 mg/kg<br>(n=122) | Total<br>(N=250)   |
|------------------------------------|---------------------------|-----------------------|--------------------|
| Age, years                         | 38.0 (18–69)              | 38.0 (18–66)          | 38.0 (18–69)       |
| Gender, no. (%)                    |                           |                       |                    |
| Male                               | 102 (79.7)                | 100 (82.0)            | 202 (80.8)         |
| Female                             | 26 (20.3)                 | 22 (18.0)             | 48 (19.2)          |
| Ethnicity, no. (%)                 |                           |                       |                    |
| White                              | 98 (76.6)                 | 91 (74.6)             | 189 (75.6)         |
| Asian                              | 16 (12.5)                 | 13 (10.7)             | 29 (11.6)          |
| Other                              | 14 (10.9)                 | 18 (14.8)             | 32 (12.8)          |
| Height, cm                         | 172.0 (148–198)           | 171.0 (147–193)       | 172.0 (147–198)    |
| Weight, kg                         | 73.00 (45.0–120.0)        | 75.70 (45.5–122.7)    | 73.75 (45.0–122.7) |
| Body mass index, kg/m <sup>2</sup> | 24.41 (18.0–38.7)         | 25.59 (17.5–42.0)     | 25.12 (17.5–42.0)  |
| Baseline BASDAI score,<br>no. (%)  |                           |                       |                    |
| <8                                 | 94 (73.4)                 | 93 (76.2)             | 187 (74.8)         |
| ≥8                                 | 34 (26.6)                 | 29 (23.8)             | 63 (25.2)          |
| Screening BASDAI score,<br>no. (%) |                           |                       |                    |
| <8                                 | 99 (77.3)                 | 95 (77.9)             | 194 (77.6)         |
| ≥8                                 | 29 (22.7)                 | 27 (22.1)             | 56 (22.4)          |

\*Except where indicated otherwise, values are the median (minimum–maximum).

BASDAI, Bath Ankylosing Spondylitis Disease Activity Index; RP, reference product.

**Online resource 2.** Agreement of immunogenicity testing between Assay ADA-A and Assay ADA-B<sup>a</sup> in PLANETAS (safety population)

| Visit                                       | Assay ADA-B outcome | Assay ADA-A outcome |     | PPA <sup>b</sup> (%) | NPA <sup>c</sup> (%) | Cohen's κ (95% CI) | p-value |
|---------------------------------------------|---------------------|---------------------|-----|----------------------|----------------------|--------------------|---------|
|                                             |                     | Pos                 | Neg |                      |                      |                    |         |
| All patients (N=250) <sup>d</sup>           |                     |                     |     |                      |                      |                    |         |
| Screening                                   | Pos                 | 2                   | 2   | 66.67                | 99.18                | 0.57 (0.12–1.00)   | <0.001  |
|                                             | Neg                 | 1                   | 242 |                      |                      |                    |         |
| Week 14                                     | Pos                 | 23                  | 0   | 95.83                | 100.00               | 0.98 (0.93–1.00)   | <0.001  |
|                                             | Neg                 | 1                   | 215 |                      |                      |                    |         |
| Week 30                                     | Pos                 | 54                  | 1   | 94.74                | 99.42                | 0.95 (0.91–1.00)   | <0.001  |
|                                             | Neg                 | 3                   | 170 |                      |                      |                    |         |
| Week 54                                     | Pos                 | 51                  | 0   | 96.23                | 100.00               | 0.97 (0.94–1.00)   | <0.001  |
|                                             | Neg                 | 2                   | 161 |                      |                      |                    |         |
| EOS                                         | Pos                 | 69                  | 1   | 87.34                | 99.36                | 0.89 (0.83–0.95)   | <0.001  |
|                                             | Neg                 | 10                  | 155 |                      |                      |                    |         |
| CT-P13 treatment group (N=128) <sup>d</sup> |                     |                     |     |                      |                      |                    |         |
| Screening                                   | Pos                 | 1                   | 1   | 50.00                | 99.20                | 0.49 (-0.11–1.00)  | <0.001  |
|                                             | Neg                 | 1                   | 124 |                      |                      |                    |         |
| Week 14                                     | Pos                 | 10                  | 0   | 90.91                | 100.00               | 0.95 (0.85–1.00)   | <0.001  |
|                                             | Neg                 | 1                   | 110 |                      |                      |                    |         |
| Week 30                                     | Pos                 | 30                  | 1   | 93.75                | 98.82                | 0.93 (0.86–1.00)   | <0.001  |
|                                             | Neg                 | 2                   | 84  |                      |                      |                    |         |
| Week 54                                     | Pos                 | 25                  | 0   | 100.00               | 100.00               | 1.00 (1.00–1.00)   | <0.001  |
|                                             | Neg                 | 0                   | 84  |                      |                      |                    |         |
| EOS                                         | Pos                 | 38                  | 0   | 86.36                | 100.00               | 0.89 (0.80–0.98)   | <0.001  |
|                                             | Neg                 | 6                   | 78  |                      |                      |                    |         |
| RP treatment group (N=122) <sup>d</sup>     |                     |                     |     |                      |                      |                    |         |
| Screening                                   | Pos                 | 1                   | 1   | 100.00               | 99.16                | 0.66 (0.04–1.00)   | <0.001  |
|                                             | Neg                 | 0                   | 118 |                      |                      |                    |         |
| Week 14                                     | Pos                 | 13                  | 0   | 100.00               | 100.00               | 1.00 (1.00–1.00)   | <0.001  |
|                                             | Neg                 | 0                   | 105 |                      |                      |                    |         |
| Week 30                                     | Pos                 | 24                  | 0   | 96.00                | 100.00               | 0.97 (0.92–1.00)   | <0.001  |
|                                             | Neg                 | 1                   | 86  |                      |                      |                    |         |
| Week 54                                     | Pos                 | 26                  | 0   | 92.86                | 100.00               | 0.95 (0.88–1.00)   | <0.001  |
|                                             | Neg                 | 2                   | 77  |                      |                      |                    |         |
| EOS                                         | Pos                 | 31                  | 1   | 88.57                | 98.72                | 0.89 (0.80–0.98)   | <0.001  |
|                                             | Neg                 | 4                   | 77  |                      |                      |                    |         |

<sup>a</sup>Assay ADA-A = ADA detection immunoassay with EU-approved Remicade tag; Assay ADA-B = ADA detection immunoassay with CT-P13 tag. <sup>b</sup>PPA = (number of patients with positive outcome for both Assay ADA-A and Assay ADA-B)/(number of patients with positive outcome for Assay ADA-A)\*100. <sup>c</sup>NPA = (number of patients with negative outcome for both Assay ADA-A and Assay ADA-B)/(number of patients with negative outcome for Assay ADA-A)\*100. <sup>d</sup>Concordance values will not reflect total patient numbers due to patients not being available for sampling or withdrawals throughout the study.

ADA, antidrug antibody; CI, confidence interval; EOS, end of study; EU, European Union; Neg, negative result; NPA, negative percentage agreement; Pos, positive result; PPA, positive percentage agreement; RP, reference product.

**Online resource 3.** Agreement of immunogenicity testing between Assay NAb-A and Assay NAb-B<sup>a</sup> in PLANETAS (safety population)

| Visit                                       | Assay NAb-B outcome | Assay NAb-A outcome |                  |                  | PPA <sup>b</sup> (%) | NPA <sup>c</sup> (%) | Cohen's κ (95% CI) | p-value |
|---------------------------------------------|---------------------|---------------------|------------------|------------------|----------------------|----------------------|--------------------|---------|
|                                             |                     | Pos                 | Neg <sup>d</sup> | QNS <sup>e</sup> |                      |                      |                    |         |
| All patients (N=250) <sup>f</sup>           |                     |                     |                  |                  |                      |                      |                    |         |
| Screening                                   | Pos                 | 0                   | 1                | 0                | 0.00                 | 99.59                | -0.01 (-0.01–0.00) | 0.928   |
|                                             | Neg <sup>d</sup>    | 2                   | 244              | 0                |                      |                      |                    |         |
|                                             | QNS                 | 0                   | 0                | 0                |                      |                      |                    |         |
| Week 14                                     | Pos                 | 22                  | 0                | 1                | 95.65                | 100.00               | 0.98 (0.93–1.00)   | <0.001  |
|                                             | Neg                 | 1                   | 215              | 0                |                      |                      |                    |         |
|                                             | QNS                 | 0                   | 0                | 0                |                      |                      |                    |         |
| Week 30                                     | Pos                 | 52                  | 2                | 1                | 94.55                | 98.84                | 0.94 (0.89–0.99)   | <0.001  |
|                                             | Neg                 | 3                   | 170              | 0                |                      |                      |                    |         |
|                                             | QNS                 | 0                   | 0                | 0                |                      |                      |                    |         |
| Week 54                                     | Pos                 | 51                  | 0                | 0                | 96.23                | 100.00               | 0.97 (0.94–1.00)   | <0.001  |
|                                             | Neg                 | 2                   | 161              | 0                |                      |                      |                    |         |
|                                             | QNS                 | 0                   | 0                | 0                |                      |                      |                    |         |
| EOS                                         | Pos                 | 66                  | 2                | 0                | 84.62                | 98.73                | 0.86 (0.79–0.93)   | <0.001  |
|                                             | Neg                 | 12                  | 155              | 0                |                      |                      |                    |         |
|                                             | QNS                 | 0                   | 0                | 0                |                      |                      |                    |         |
| CT-P13 treatment group (N=128) <sup>f</sup> |                     |                     |                  |                  |                      |                      |                    |         |
| Screening                                   | Pos                 | 0                   | 1                | 0                | 0.00                 | 99.21                | -0.01 (-0.02–0.00) | 0.929   |
|                                             | Neg                 | 1                   | 125              | 0                |                      |                      |                    |         |
|                                             | QNS                 | 0                   | 0                | 0                |                      |                      |                    |         |
| Week 14                                     | Pos                 | 9                   | 0                | 1                | 90.00                | 100.00               | 0.94 (0.83–1.00)   | <0.001  |
|                                             | Neg                 | 1                   | 110              | 0                |                      |                      |                    |         |
|                                             | QNS                 | 0                   | 0                | 0                |                      |                      |                    |         |
| Week 30                                     | Pos                 | 29                  | 1                | 1                | 93.55                | 98.82                | 0.93 (0.86–1.00)   | <0.001  |
|                                             | Neg                 | 2                   | 84               | 0                |                      |                      |                    |         |
|                                             | QNS                 | 0                   | 0                | 0                |                      |                      |                    |         |
| Week 54                                     | Pos                 | 25                  | 0                | 0                | 100.00               | 100.00               | 1.00 (1.00–1.00)   | <0.001  |
|                                             | Neg                 | 0                   | 84               | 0                |                      |                      |                    |         |
|                                             | QNS                 | 0                   | 0                | 0                |                      |                      |                    |         |
| EOS                                         | Pos                 | 35                  | 1                | 0                | 81.40                | 98.73                | 0.83 (0.73–0.94)   | <0.001  |
|                                             | Neg                 | 8                   | 78               | 0                |                      |                      |                    |         |
|                                             | QNS                 | 0                   | 0                | 0                |                      |                      |                    |         |
| RP treatment group (N=122) <sup>f</sup>     |                     |                     |                  |                  |                      |                      |                    |         |
| Screening                                   | Pos                 | 0                   | 0                | 0                | 0.00                 | 100.00               | NE (NE–NE)         | NE      |
|                                             | Neg <sup>d</sup>    | 1                   | 119              | 0                |                      |                      |                    |         |
|                                             | QNS                 | 0                   | 0                | 0                |                      |                      |                    |         |
| Week 14                                     | Pos                 | 13                  | 0                | 0                | 100.00               | 100.00               | 1.00 (1.00–1.00)   | <0.001  |
|                                             | Neg                 | 0                   | 105              | 0                |                      |                      |                    |         |
|                                             | QNS                 | 0                   | 0                | 0                |                      |                      |                    |         |
| Week 30                                     | Pos                 | 23                  | 1                | 0                | 95.83                | 98.85                | 0.95 (0.87–1.00)   | <0.001  |
|                                             | Neg                 | 1                   | 86               | 0                |                      |                      |                    |         |
|                                             | QNS                 | 0                   | 0                | 0                |                      |                      |                    |         |
| Week 54                                     | Pos                 | 26                  | 0                | 0                | 92.86                | 100.00               | 0.95 (0.88–1.00)   | <0.001  |

|     |     |    |    |   |       |       |                  |        |
|-----|-----|----|----|---|-------|-------|------------------|--------|
|     | Neg | 2  | 77 | 0 |       |       |                  |        |
|     | QNS | 0  | 0  | 0 | -     | -     | -                | -      |
| EOS | Pos | 31 | 1  | 0 | 88.57 | 98.72 | 0.89 (0.80–0.98) | <0.001 |
|     | Neg | 4  | 77 | 0 |       |       |                  |        |
|     | QNS | 0  | 0  | 0 | -     | -     | -                | -      |

<sup>a</sup>Assay NAb-A = NAb detection immunoassay with EU-approved Remicade tag; Assay NAb-B = NAb detection immunoassay with CT-P13 tag. <sup>b</sup>PPA = (number of patients with positive outcome for both Assay NAb-A and Assay NAb-B)/(number of patients with positive outcome for Assay NAb-A)\*100. <sup>c</sup>NPA = (number of patients with negative outcome for both Assay NAb-A and Assay NAb-B)/(number of patients with negative outcome for Assay NAb-A)\*100. <sup>d</sup>The NAb-negative population constitutes both 1) patients who were originally tested for ADA and were found to be negative (and therefore, not further tested for NAb) and 2) patients who originally tested positive for ADA but were subsequently found to be negative for NAb. <sup>e</sup>Counts of QNS are for information purposes only and not used in calculation of PPA, NPA or Cohen's  $\kappa$ . <sup>f</sup>Concordance values will not reflect total patient numbers due to patients not being available for sampling or withdrawals throughout the study.

ADA, antidrug antibody; CI, confidence interval; EOS, end of study; EU, European Union; NAb, neutralising antibody; NE, not estimable; Neg, negative result; NPA, negative percentage agreement; Pos, positive result; PPA, positive percentage agreement; QNS, quantity not sufficient; RP, reference product.

**Online resource 4.** Baseline patient characteristics for the PLANETRA safety population

(patients with rheumatoid arthritis)

| Characteristic*                            | CT-P13<br>3 mg/kg<br>(n=302) | RP<br>3 mg/kg<br>(n=300) | Total<br>(N=602)       |
|--------------------------------------------|------------------------------|--------------------------|------------------------|
| Age, years                                 | 50 (18–75)                   | 50 (21–74)               | 50 (18–75)             |
| Gender, no. (%)                            |                              |                          |                        |
| Female                                     | 245 (81.1)                   | 252 (84.0)               | 497 (82.6)             |
| Male                                       | 57 (18.9)                    | 48 (16.0)                | 105 (17.4)             |
| Ethnicity, no. (%)                         |                              |                          |                        |
| Asian                                      | 34 (11.3)                    | 36 (12.0)                | 70 (11.6)              |
| Black                                      | 2 (0.7)                      | 1 (0.3)                  | 3 (0.5)                |
| White                                      | 220 (72.8)                   | 219 (73.0)               | 439 (72.9)             |
| Other                                      | 46 (15.2)                    | 44 (14.7)                | 90 (15.0)              |
| Height (cm)                                | 162.0<br>(144.0–186.0)       | 162.0<br>(124.0–190.0)   | 162.0<br>(124.0–190.0) |
| Weight (kg)                                | 69.0<br>(36.5–134.0)         | 68.0<br>(36.0–136.0)     | 68.75<br>(36.0–136.0)  |
| Body mass index (kg/m <sup>2</sup> )       | 26.32<br>(13.9–49.8)         | 25.33<br>(15.0–53.1)     | 25.85<br>(13.9–53.1)   |
| Baseline serum CRP concentration, no. (%)  |                              |                          |                        |
| ≤2mg/ dL                                   | 162 (53.6)                   | 164 (54.7)               | 326 (54.2)             |
| >2mg/ dL                                   | 140 (46.4)                   | 136 (45.3)               | 276 (45.8)             |
| Screening serum CRP concentration, no. (%) |                              |                          |                        |
| ≤2mg/ dL                                   | 196 (64.9)                   | 202 (67.3)               | 398 (66.1)             |
| >2mg/ dL                                   | 105 (34.8)                   | 98 (32.7)                | 203 (33.7)             |

\*Except where indicated otherwise, values are the median (minimum–maximum).

CRP, C-reactive protein; RP, reference product.

**Online resource 5.** Agreement of immunogenicity testing between Assay ADA-A and Assay ADA-B<sup>a</sup> in PLANETRA (safety population)

| Visit                                       | Assay ADA-B outcome  | Assay ADA-A outcome |     |                      | PPA <sup>b</sup> (%) | NPA <sup>c</sup> (%) | Cohen's $\kappa$ (95% CI) | p-value |
|---------------------------------------------|----------------------|---------------------|-----|----------------------|----------------------|----------------------|---------------------------|---------|
|                                             |                      | Pos                 | Neg | Missing <sup>d</sup> |                      |                      |                           |         |
| All patients (N=602) <sup>e</sup>           |                      |                     |     |                      |                      |                      |                           |         |
| Screening                                   | Pos                  | 15                  | 4   | 0                    | 100.00               | 99.32                | 0.88 (0.76–1.00)          | <0.001  |
|                                             | Neg                  | 0                   | 580 | 0                    |                      |                      |                           |         |
|                                             | Missing <sup>d</sup> | 0                   | 0   | 0                    |                      |                      |                           |         |
| Week 14                                     | Pos                  | 134                 | 8   | 0                    | 97.10                | 98.01                | 0.94 (0.91–0.97)          | <0.001  |
|                                             | Neg                  | 4                   | 395 | 0                    |                      |                      |                           |         |
|                                             | Missing              | 1                   | 1   | 0                    |                      |                      |                           |         |
| Week 30                                     | Pos                  | 238                 | 8   | 0                    | 97.54                | 96.93                | 0.94 (0.92–0.97)          | <0.001  |
|                                             | Neg                  | 6                   | 253 | 0                    |                      |                      |                           |         |
|                                             | Missing              | 0                   | 0   | 0                    |                      |                      |                           |         |
| Week 54                                     | Pos                  | 220                 | 7   | 0                    | 94.83                | 96.86                | 0.92 (0.88–0.95)          | <0.001  |
|                                             | Neg                  | 12                  | 216 | 0                    |                      |                      |                           |         |
|                                             | Missing              | 0                   | 0   | 0                    |                      |                      |                           |         |
| EOS                                         | Pos                  | 292                 | 3   | 1                    | 94.50                | 98.69                | 0.92 (0.89–0.96)          | <0.001  |
|                                             | Neg                  | 17                  | 226 | 0                    |                      |                      |                           |         |
|                                             | Missing              | 0                   | 0   | 0                    |                      |                      |                           |         |
| CT-P13 treatment group (N=302) <sup>e</sup> |                      |                     |     |                      |                      |                      |                           |         |
| Screening                                   | Pos                  | 9                   | 3   | 0                    | 100.00               | 98.97                | 0.85 (0.69–1.00)          | <0.001  |
|                                             | Neg                  | 0                   | 289 | 0                    |                      |                      |                           |         |
|                                             | Missing              | 0                   | 0   | 0                    |                      |                      |                           |         |
| Week 14                                     | Pos                  | 68                  | 4   | 0                    | 98.55                | 98.02                | 0.95 (0.91–0.99)          | <0.001  |
|                                             | Neg                  | 1                   | 198 | 0                    |                      |                      |                           |         |
|                                             | Missing              | 0                   | 1   | 0                    |                      |                      |                           |         |
| Week 30                                     | Pos                  | 120                 | 6   | 0                    | 98.36                | 95.38                | 0.94 (0.89–0.98)          | <0.001  |
|                                             | Neg                  | 2                   | 124 | 0                    |                      |                      |                           |         |
|                                             | Missing              | 0                   | 0   | 0                    |                      |                      |                           |         |
| Week 54                                     | Pos                  | 120                 | 5   | 0                    | 96.77                | 95.58                | 0.92 (0.88–0.97)          | <0.001  |
|                                             | Neg                  | 4                   | 108 | 0                    |                      |                      |                           |         |
|                                             | Missing              | 0                   | 0   | 0                    |                      |                      |                           |         |
| EOS                                         | Pos                  | 150                 | 1   | 1                    | 94.94                | 99.10                | 0.93 (0.89–0.98)          | <0.001  |
|                                             | Neg                  | 8                   | 110 | 0                    |                      |                      |                           |         |
|                                             | Missing              | 0                   | 0   | 0                    |                      |                      |                           |         |
| RP treatment group (N=300) <sup>e</sup>     |                      |                     |     |                      |                      |                      |                           |         |
| Screening                                   | Pos                  | 6                   | 1   | 0                    | 100.00               | 99.66                | 0.92 (0.77–1.00)          | <0.001  |
|                                             | Neg                  | 0                   | 291 | 0                    |                      |                      |                           |         |
|                                             | Missing              | 0                   | 0   | 0                    |                      |                      |                           |         |
| Week 14                                     | Pos                  | 66                  | 4   | 0                    | 95.65                | 98.01                | 0.93 (0.88–0.98)          | <0.001  |
|                                             | Neg                  | 3                   | 197 | 0                    |                      |                      |                           |         |
|                                             | Missing              | 1                   | 0   | 0                    |                      |                      |                           |         |
| Week 30                                     | Pos                  | 118                 | 2   | 0                    | 96.72                | 98.47                | 0.95 (0.91–0.99)          | <0.001  |
|                                             | Neg                  | 4                   | 129 | 0                    |                      |                      |                           |         |
|                                             | Missing              | 0                   | 0   | 0                    |                      |                      |                           |         |
| Week 54                                     | Pos                  | 100                 | 2   | 0                    | 92.59                | 98.18                | 0.91 (0.85–0.96)          | <0.001  |



|     |         |     |     |   |       |       |                  |        |
|-----|---------|-----|-----|---|-------|-------|------------------|--------|
|     | Neg     | 8   | 108 | 0 |       |       |                  |        |
|     | Missing | 0   | 0   | 0 | -     | -     | -                | -      |
| EOS | Pos     | 142 | 2   | 0 | 94.04 | 98.31 | 0.92 (0.87–0.97) | <0.001 |
|     | Neg     | 9   | 116 | 0 |       |       |                  |        |
|     | Missing | 0   | 0   | 0 | -     | -     | -                | -      |

<sup>a</sup>Assay ADA-A = ADA detection immunoassay with EU-approved Remicade tag; Assay ADA-B = ADA detection immunoassay with CT-P13 tag. <sup>b</sup>PPA = (number of patients with positive outcome for both Assay ADA-A and Assay ADA-B)/(number of patients with positive outcome for Assay ADA-A)\*100. <sup>c</sup>NPA = (number of patients with negative outcome for both Assay ADA-A and Assay ADA-B)/(number of patients with negative outcome for Assay ADA-A)\*100. <sup>d</sup>Counts of missing values are for information purposes only, are not used in calculations of PPA, NPA or  $\kappa$  and include patients with a QNS outcome. <sup>e</sup>Concordance values will not reflect total patient numbers due to patients not being available for sampling or withdrawals throughout the study.

ADA, antidrug antibody; CI, confidence interval; EOS, end of study; EU, European Union; Neg, negative result; NPA, negative percentage agreement; Pos, positive result; PPA, positive percentage agreement; QNS, quantity not sufficient; RP, reference product.

**Online resource 6.** Agreement of immunogenicity testing between Assay NAb-A and Assay NAb-B<sup>a</sup> in PLANETRA (safety population)

| Visit                                       | Assay NAb-B outcome  | Assay NAb-A outcome |                  |                      | PPA <sup>b</sup> (%) | NPA <sup>c</sup> (%) | Cohen's $\kappa$ (95% CI) | p-value |
|---------------------------------------------|----------------------|---------------------|------------------|----------------------|----------------------|----------------------|---------------------------|---------|
|                                             |                      | Pos                 | Neg <sup>d</sup> | Missing <sup>e</sup> |                      |                      |                           |         |
| All patients (N=602) <sup>f</sup>           |                      |                     |                  |                      |                      |                      |                           |         |
| Screening                                   | Pos                  | 3                   | 2                | 0                    | 60.00                | 99.66                | 0.60 (0.24–0.96)          | <0.001  |
|                                             | Neg                  | 2                   | 592              | 0                    |                      |                      |                           |         |
|                                             | Missing <sup>d</sup> | 0                   | 0                | 0                    |                      |                      |                           |         |
| Week 14                                     | Pos                  | 130                 | 8                | 2                    | 96.30                | 98.02                | 0.94 (0.90–0.97)          | <0.001  |
|                                             | Neg                  | 5                   | 396              | 0                    |                      |                      |                           |         |
|                                             | Missing              | 1                   | 1                | 0                    |                      |                      |                           |         |
| Week 30                                     | Pos                  | 234                 | 8                | 0                    | 96.30                | 96.95                | 0.93 (0.90–0.96)          | <0.001  |
|                                             | Neg                  | 9                   | 254              | 0                    |                      |                      |                           |         |
|                                             | Missing              | 0                   | 0                | 0                    |                      |                      |                           |         |
| Week 54                                     | Pos                  | 216                 | 8                | 0                    | 95.15                | 96.49                | 0.92 (0.88–0.95)          | <0.001  |
|                                             | Neg                  | 11                  | 220              | 0                    |                      |                      |                           |         |
|                                             | Missing              | 0                   | 0                | 0                    |                      |                      |                           |         |
| EOS                                         | Pos                  | 287                 | 5                | 1                    | 94.72                | 97.87                | 0.92 (0.89–0.95)          | <0.001  |
|                                             | Neg                  | 16                  | 230              | 0                    |                      |                      |                           |         |
|                                             | Missing              | 0                   | 0                | 0                    |                      |                      |                           |         |
| CT-P13 treatment group (N=302) <sup>f</sup> |                      |                     |                  |                      |                      |                      |                           |         |
| Screening                                   | Pos                  | 1                   | 1                | 0                    | 33.33                | 99.66                | 0.40 (-0.15–0.94)         | <0.001  |
|                                             | Neg                  | 2                   | 297              | 0                    |                      |                      |                           |         |
|                                             | Missing              | 0                   | 0                | 0                    |                      |                      |                           |         |
| Week 14                                     | Pos                  | 67                  | 4                | 0                    | 97.10                | 98.02                | 0.94 (0.90–0.99)          | <0.001  |
|                                             | Neg                  | 2                   | 198              | 0                    |                      |                      |                           |         |
|                                             | Missing              | 0                   | 1                | 0                    |                      |                      |                           |         |
| Week 30                                     | Pos                  | 117                 | 6                | 0                    | 96.69                | 95.42                | 0.92 (0.87–0.97)          | <0.001  |
|                                             | Neg                  | 4                   | 125              | 0                    |                      |                      |                           |         |
|                                             | Missing              | 0                   | 0                | 0                    |                      |                      |                           |         |
| Week 54                                     | Pos                  | 120                 | 5                | 0                    | 97.56                | 95.61                | 0.93 (0.89–0.98)          | <0.001  |
|                                             | Neg                  | 3                   | 109              | 0                    |                      |                      |                           |         |
|                                             | Missing              | 0                   | 0                | 0                    |                      |                      |                           |         |
| EOS                                         | Pos                  | 148                 | 2                | 1                    | 95.48                | 98.25                | 0.93 (0.89–0.98)          | <0.001  |
|                                             | Neg                  | 7                   | 112              | 0                    |                      |                      |                           |         |
|                                             | Missing              | 0                   | 0                | 0                    |                      |                      |                           |         |
| RP treatment group (N=300) <sup>f</sup>     |                      |                     |                  |                      |                      |                      |                           |         |
| Screening                                   | Pos                  | 2                   | 1                | 0                    | 100.00               | 99.66                | 0.80 (0.41–1.00)          | <0.001  |
|                                             | Neg                  | 0                   | 295              | 0                    |                      |                      |                           |         |
|                                             | Missing              | 0                   | 0                | 0                    |                      |                      |                           |         |
| Week 14                                     | Pos                  | 63                  | 4                | 2                    | 95.45                | 98.02                | 0.93 (0.88–0.98)          | <0.001  |
|                                             | Neg                  | 3                   | 198              | 0                    |                      |                      |                           |         |
|                                             | Missing              | 1                   | 0                | 0                    |                      |                      |                           |         |
| Week 30                                     | Pos                  | 117                 | 2                | 0                    | 95.90                | 98.47                | 0.94 (0.90–0.99)          | <0.001  |
|                                             | Neg                  | 5                   | 129              | 0                    |                      |                      |                           |         |
|                                             | Missing              | 0                   | 0                | 0                    |                      |                      |                           |         |

|         |         |     |     |   |       |       |                  |        |
|---------|---------|-----|-----|---|-------|-------|------------------|--------|
| Week 54 | Pos     | 96  | 3   | 0 | 92.31 | 97.37 | 0.90 (0.84–0.96) | <0.001 |
|         | Neg     | 8   | 111 | 0 | -     | -     | -                | -      |
|         | Missing | 0   | 0   | 0 | -     | -     | -                | -      |
| EOS     | Pos     | 139 | 3   | 0 | 93.92 | 97.52 | 0.91 (0.86–0.96) | <0.001 |
|         | Neg     | 9   | 118 | 0 | -     | -     | -                | -      |
|         | Missing | 0   | 0   | 0 | -     | -     | -                | -      |

<sup>a</sup>Assay NAb-A = NAb detection immunoassay with EU-approved Remicade tag; Assay NAb-B = NAb detection immunoassay with CT-P13 tag. <sup>b</sup>PPA = (number of patients with positive outcome for both Assay NAb-A and Assay NAb-B)/(number of patients with positive outcome for Assay NAb-A)\*100. <sup>c</sup>NPA = (number of patients with negative outcome for both Assay NAb-A and Assay NAb-B)/(number of patients with negative outcome for Assay NAb-A)\*100. <sup>d</sup>The NAb-negative population constitutes both 1) patients who were originally tested for ADA and were found to be negative (and therefore, not further tested for NAb) and 2) patients who originally tested positive for ADA but were subsequently found to be negative for NAb. <sup>e</sup>Counts of missing values are for information purposes only, are not used in calculations of PPA, NPA or  $\kappa$  and include patients with a QNS outcome. <sup>f</sup>Concordance values will not reflect total patient numbers due to patients not being available for sampling or withdrawals throughout the study.

ADA, antidrug antibody; CI, confidence interval; EOS, end of study; EU, European Union; NAb, neutralising antibody; Neg, negative result; NPA, negative percentage agreement; Pos, positive result; PPA, positive percentage agreement; QNS, quantity not sufficient; RP, reference product.

**Online resource 7.** Agreement of immunogenicity testing between Assay ADA-A and Assay ADA-B<sup>a</sup> in pooled analysis of PLANETAS and PLANETRA (safety populations)

| Visit                                   | Assay ADA-B outcome  | Assay ADA-A outcome |     |                      | PPA <sup>b</sup> (%) | NPA <sup>c</sup> (%) | Cohen's $\kappa$ (95% CI) | p-value |
|-----------------------------------------|----------------------|---------------------|-----|----------------------|----------------------|----------------------|---------------------------|---------|
|                                         |                      | Pos                 | Neg | Missing <sup>d</sup> |                      |                      |                           |         |
| All patients (N=852) <sup>e</sup>       |                      |                     |     |                      |                      |                      |                           |         |
| Screening                               | Pos                  | 17                  | 6   | 0                    | 94.44                | 99.28                | 0.83 (0.70–0.95)          | <0.001  |
|                                         | Neg                  | 1                   | 822 | 0                    |                      |                      |                           |         |
|                                         | Missing <sup>d</sup> | 0                   | 0   | 0                    |                      |                      |                           |         |
| Week 14                                 | Pos                  | 157                 | 8   | 0                    | 96.91                | 98.71                | 0.95 (0.92–0.98)          | <0.001  |
|                                         | Neg                  | 5                   | 610 | 0                    |                      |                      |                           |         |
|                                         | Missing              | 1                   | 1   | 0                    |                      |                      |                           |         |
| Week 30                                 | Pos                  | 292                 | 9   | 0                    | 97.01                | 97.92                | 0.95 (0.93–0.97)          | <0.001  |
|                                         | Neg                  | 9                   | 423 | 0                    |                      |                      |                           |         |
|                                         | Missing              | 0                   | 0   | 0                    |                      |                      |                           |         |
| Week 54                                 | Pos                  | 271                 | 7   | 0                    | 95.09                | 98.18                | 0.94 (0.91–0.96)          | <0.001  |
|                                         | Neg                  | 14                  | 377 | 0                    |                      |                      |                           |         |
|                                         | Missing              | 0                   | 0   | 0                    |                      |                      |                           |         |
| EOS                                     | Pos                  | 361                 | 4   | 1                    | 93.04                | 98.96                | 0.92 (0.89–0.95)          | <0.001  |
|                                         | Neg                  | 27                  | 381 | 0                    |                      |                      |                           |         |
|                                         | Missing              | 0                   | 0   | 0                    |                      |                      |                           |         |
| CT-P13 group (N=430) <sup>e</sup>       |                      |                     |     |                      |                      |                      |                           |         |
| Screening                               | Pos                  | 10                  | 4   | 0                    | 90.91                | 99.04                | 0.79 (0.62–0.97)          | <0.001  |
|                                         | Neg                  | 1                   | 413 | 0                    |                      |                      |                           |         |
|                                         | Missing              | 0                   | 0   | 0                    |                      |                      |                           |         |
| Week 14                                 | Pos                  | 78                  | 4   | 0                    | 97.50                | 98.72                | 0.95 (0.92–0.99)          | <0.001  |
|                                         | Neg                  | 2                   | 308 | 0                    |                      |                      |                           |         |
|                                         | Missing              | 0                   | 1   | 0                    |                      |                      |                           |         |
| Week 30                                 | Pos                  | 150                 | 7   | 0                    | 97.40                | 96.74                | 0.94 (0.90–0.97)          | <0.001  |
|                                         | Neg                  | 4                   | 208 | 0                    |                      |                      |                           |         |
|                                         | Missing              | 0                   | 0   | 0                    |                      |                      |                           |         |
| Week 54                                 | Pos                  | 145                 | 5   | 0                    | 97.32                | 97.46                | 0.95 (0.91–0.98)          | <0.001  |
|                                         | Neg                  | 4                   | 192 | 0                    |                      |                      |                           |         |
|                                         | Missing              | 0                   | 0   | 0                    |                      |                      |                           |         |
| EOS                                     | Pos                  | 188                 | 1   | 1                    | 93.07                | 99.47                | 0.92 (0.89–0.96)          | <0.001  |
|                                         | Neg                  | 14                  | 188 | 0                    |                      |                      |                           |         |
|                                         | Missing              | 0                   | 0   | 0                    |                      |                      |                           |         |
| RP treatment group (N=422) <sup>e</sup> |                      |                     |     |                      |                      |                      |                           |         |
| Screening                               | Pos                  | 7                   | 2   | 0                    | 100.00               | 99.51                | 0.87 (0.70–1.00)          | <0.001  |
|                                         | Neg                  | 0                   | 409 | 0                    |                      |                      |                           |         |
|                                         | Missing              | 0                   | 0   | 0                    |                      |                      |                           |         |
| Week 14                                 | Pos                  | 79                  | 4   | 0                    | 96.34                | 98.69                | 0.95 (0.91–0.99)          | <0.001  |
|                                         | Neg                  | 3                   | 302 | 0                    |                      |                      |                           |         |
|                                         | Missing              | 1                   | 0   | 0                    |                      |                      |                           |         |
| Week 30                                 | Pos                  | 142                 | 2   | 0                    | 96.60                | 99.08                | 0.96 (0.93–0.99)          | <0.001  |
|                                         | Neg                  | 5                   | 215 | 0                    |                      |                      |                           |         |
|                                         | Missing              | 0                   | 0   | 0                    |                      |                      |                           |         |
| Week 54                                 | Pos                  | 126                 | 2   | 0                    | 92.65                | 98.93                | 0.92 (0.88–0.97)          | <0.001  |

|     |         |     |     |   |       |       |                  |        |
|-----|---------|-----|-----|---|-------|-------|------------------|--------|
|     | Neg     | 10  | 185 | 0 |       |       |                  |        |
|     | Missing | 0   | 0   | 0 | -     | -     | -                | -      |
| EOS | Pos     | 173 | 3   | 0 | 93.01 | 98.47 | 0.92 (0.88–0.96) | <0.001 |
|     | Neg     | 13  | 193 | 0 |       |       |                  |        |
|     | Missing | 0   | 0   | 0 | -     | -     | -                | -      |

<sup>a</sup>Assay ADA-A = ADA detection immunoassay with EU-approved Remicade tag; Assay ADA-B = ADA detection immunoassay with CT-P13 tag. <sup>b</sup>PPA = (number of patients with positive outcome for both Assay ADA-A and Assay ADA-B)/(number of patients with positive outcome for Assay ADA-A)\*100. <sup>c</sup>NPA = (number of patients with negative outcome for both Assay ADA-A and Assay ADA-B)/(number of patients with negative outcome for Assay ADA-A)\*100. <sup>d</sup>Counts of missing values are for information purposes only, are not used in calculations of PPA, NPA or  $\kappa$  and include patients with a QNS outcome. <sup>e</sup>Concordance values will not reflect total patient numbers due to patients not being available for sampling or withdrawals throughout the study.

ADA, antidrug antibody; CI, confidence interval; EOS, end of study; EU, European Union; Neg, negative result; NPA, negative percentage agreement; Pos, positive result; PPA, positive percentage agreement; QNS, quantity not sufficient; RP, reference product.

**Online resource 8.** Agreement of immunogenicity testing between Assay NAb-A and NAb-B<sup>a</sup> in pooled analysis of PLANETAS and PLANETRA (safety populations)

| Visit                                       | Assay NAb-B outcome  | Assay NAb-A outcome |                  |                      | PPA <sup>b</sup> (%) | NPA <sup>c</sup> (%) | Cohen's $\kappa$ (95% CI) | p-value |
|---------------------------------------------|----------------------|---------------------|------------------|----------------------|----------------------|----------------------|---------------------------|---------|
|                                             |                      | Pos                 | Neg <sup>d</sup> | Missing <sup>e</sup> |                      |                      |                           |         |
| All patients (N=852) <sup>f</sup>           |                      |                     |                  |                      |                      |                      |                           |         |
| Screening                                   | Pos                  | 3                   | 3                | 0                    | 42.86                | 99.64                | 0.46 (0.12–0.80)          | <0.001  |
|                                             | Neg                  | 4                   | 836              | 0                    |                      |                      |                           |         |
|                                             | Missing <sup>e</sup> | 0                   | 0                | 0                    |                      |                      |                           |         |
| Week 14                                     | Pos                  | 152                 | 8                | 3                    | 96.20                | 98.71                | 0.94 (0.92–0.97)          | <0.001  |
|                                             | Neg                  | 6                   | 611              | 0                    |                      |                      |                           |         |
|                                             | Missing              | 1                   | 1                | 0                    |                      |                      |                           |         |
| Week 30                                     | Pos                  | 286                 | 10               | 1                    | 95.97                | 97.70                | 0.94 (0.91–0.96)          | <0.001  |
|                                             | Neg                  | 12                  | 424              | 0                    |                      |                      |                           |         |
|                                             | Missing              | 0                   | 0                | 0                    |                      |                      |                           |         |
| Week 54                                     | Pos                  | 267                 | 8                | 0                    | 95.36                | 97.94                | 0.94 (0.91–0.96)          | <0.001  |
|                                             | Neg                  | 13                  | 381              | 0                    |                      |                      |                           |         |
|                                             | Missing              | 0                   | 0                | 0                    |                      |                      |                           |         |
| EOS                                         | Pos                  | 353                 | 7                | 1                    | 92.65                | 98.21                | 0.91 (0.88–0.94)          | <0.001  |
|                                             | Neg                  | 28                  | 385              | 0                    |                      |                      |                           |         |
|                                             | Missing              | 0                   | 0                | 0                    |                      |                      |                           |         |
| CT-P13 treatment group (N=430) <sup>f</sup> |                      |                     |                  |                      |                      |                      |                           |         |
| Screening                                   | Pos                  | 1                   | 2                | 0                    | 25.00                | 99.53                | 0.28 (-0.16–0.72)         | <0.001  |
|                                             | Neg                  | 3                   | 422              | 0                    |                      |                      |                           |         |
|                                             | Missing              | 0                   | 0                | 0                    |                      |                      |                           |         |
| Week 14                                     | Pos                  | 76                  | 4                | 1                    | 96.20                | 98.72                | 0.94 (0.90–0.99)          | <0.001  |
|                                             | Neg                  | 3                   | 308              | 0                    |                      |                      |                           |         |
|                                             | Missing              | 0                   | 1                | 0                    |                      |                      |                           |         |
| Week 30                                     | Pos                  | 146                 | 7                | 1                    | 96.05                | 96.76                | 0.93 (0.89–0.97)          | <0.001  |
|                                             | Neg                  | 6                   | 209              | 0                    |                      |                      |                           |         |
|                                             | Missing              | 0                   | 0                | 0                    |                      |                      |                           |         |
| Week 54                                     | Pos                  | 145                 | 5                | 0                    | 97.97                | 97.47                | 0.95 (0.92–0.99)          | <0.001  |
|                                             | Neg                  | 3                   | 193              | 0                    |                      |                      |                           |         |
|                                             | Missing              | 0                   | 0                | 0                    |                      |                      |                           |         |
| EOS                                         | Pos                  | 183                 | 3                | 1                    | 92.42                | 98.45                | 0.91 (0.87–0.95)          | <0.001  |
|                                             | Neg                  | 15                  | 190              | 0                    |                      |                      |                           |         |
|                                             | Missing              | 0                   | 0                | 0                    |                      |                      |                           |         |
| RP treatment group (N=422) <sup>f</sup>     |                      |                     |                  |                      |                      |                      |                           |         |
| Screening                                   | Pos                  | 2                   | 1                | 0                    | 66.67                | 99.76                | 0.66 (0.23–1.00)          | <0.001  |
|                                             | Neg                  | 1                   | 414              | 0                    |                      |                      |                           |         |
|                                             | Missing              | 0                   | 0                | 0                    |                      |                      |                           |         |
| Week 14                                     | Pos                  | 76                  | 4                | 2                    | 96.20                | 98.70                | 0.94 (0.90–0.99)          | <0.001  |
|                                             | Neg                  | 3                   | 303              | 0                    |                      |                      |                           |         |
|                                             | Missing              | 1                   | 0                | 0                    |                      |                      |                           |         |
| Week 30                                     | Pos                  | 140                 | 3                | 0                    | 95.89                | 98.62                | 0.95 (0.92–0.98)          | <0.001  |
|                                             | Neg                  | 6                   | 215              | 0                    |                      |                      |                           |         |

|         |         |     |     |   |       |       |                  |        |
|---------|---------|-----|-----|---|-------|-------|------------------|--------|
|         | Missing | 0   | 0   | 0 | -     | -     | -                | -      |
| Week 54 | Pos     | 122 | 3   | 0 | 92.42 | 98.43 | 0.92 (0.87–0.96) | <0.001 |
|         | Neg     | 10  | 188 | 0 | -     | -     | -                | -      |
|         | Missing | 0   | 0   | 0 | -     | -     | -                | -      |
| EOS     | Pos     | 170 | 4   | 0 | 92.90 | 97.99 | 0.91 (0.87–0.95) | <0.001 |
|         | Neg     | 13  | 195 | 0 | -     | -     | -                | -      |
|         | Missing | 0   | 0   | 0 | -     | -     | -                | -      |

<sup>a</sup>Assay NAb-A = NAb detection immunoassay with EU-approved Remicade tag; Assay NAb-B = NAb detection immunoassay with CT-P13 tag. <sup>b</sup>PPA = (number of patients with positive outcome for both Assay NAb-A and Assay NAb-B)/(number of patients with positive outcome for Assay NAb-A)\*100. <sup>c</sup>NPA = (number of patients with negative outcome for both Assay NAb-A and Assay NAb-B)/(number of patients with negative outcome for Assay NAb-A)\*100. <sup>d</sup>The NAb-negative population constitutes both 1) patients who were originally tested for ADA and were found to be negative (and therefore, not further tested for NAb) and 2) patients who originally tested positive for ADA but were subsequently found negative for NAb. <sup>e</sup>Counts of missing values are for information purposes only, are not used in calculations of PPA, NPA or  $\kappa$  and include patients with a QNS. <sup>f</sup>Concordance values will not reflect total patient numbers due to patients not being available for sampling or withdrawals throughout the study.

ADA, antidrug antibody; CI, confidence interval; EOS, end of study; EU, European Union; NAb, neutralising antibody; Neg, negative result; NPA, negative percentage agreement; Pos, positive result; PPA, positive percentage agreement; QNS, quantity not sufficient; RP, reference product.
